# Supplementary material for: Prognostic Implication of Serum Glycated Albumin for Patients With Non-ST-segment Elevation Acute Coronary Syndrome Undergoing Percutaneous Coronary Intervention
Source: Research Square preprint supplement (doi:10.21203/rs.3.rs-1118979/v1), 2021-12-01
Supplement: Supplementary file 1 [file 22cb16e55a706a1630e7646a.docx]

## Table S1. Unadjusted Cox regression analysis investigating predictors of primary endpoint

|  | MACCE | | |
| --- | --- | --- | --- |
| HR | 95% CI | *P* value |
| Age, per 1 years | 1.036 | 1.025-1.046 | < 0.001 |
| Gender, male as reference | 1.227 | 1.025-1.470 | 0.026 |
| BMI, per 1 kg/m2 | 1.030 | 1.004-1.057 | 0.023 |
| Heart rate, per 1 bpm | 1.007 | 0.999-1.015 | 0.107 |
| SBP, per 1 mmHg | 1.007 | 1.002-1.012 | 0.008 |
| DBP, per 1 mmHg | 0.999 | 0.991-1.008 | 0.858 |
| Smoking history | 0.916 | 0.774-1.084 | 0.308 |
| Drinking history | 0.843 | 0.686-1.036 | 0.104 |
| Family history of CAD | 1.029 | 0.784-1.351 | 0.836 |
| Diabetes | 1.460 | 1.232-1.730 | < 0.001 |
| Hypertension | 1.273 | 1.065-1.522 | 0.008 |
| Previous MI | 2.269 | 1.902-2.707 | < 0.001 |
| Previous PCI | 1.734 | 1.426-2.108 | < 0.001 |
| Previous PAD | 1.155 | 0.747-1.787 | 0.517 |
| TG, per 1 mmol/L | 1.571 | 1.455-1.695 | < 0.001 |
| TC, per 1 mmol/L | 1.118 | 1.035-1.207 | 0.004 |
| LDL-C, per 1 mmol/L | 1.040 | 0.947-1.141 | 0.415 |
| HDL-C, per 1 mmol/L | 0.334 | 0.225-0.494 | < 0.001 |
| hs-CRP, per 1 mg/L | 1.012 | 0.999-1.024 | 0.062 |
| eGFR, per 1 mL/(min × 1.73m2) | 0.991 | 0.987-0.995 | < 0.001 |
| FBG, per 1 mmol/L | 1.116 | 1.084-1.150 | < 0.001 |
| HbA1c, per 1% | 1.262 | 1.192-1.336 | < 0.001 |
| LVEF, per 1% | 0.962 | 0.951-0.973 | < 0.001 |
| DAPT at discharge | 0.443 | 0.062-3.151 | 0.416 |
| Statins at discharge | 1.450 | 0.750-2.802 | 0.269 |
| OHA at discharge | 1.310 | 1.068-1.606 | 0.009 |
| Insulin at discharge | 1.641 | 1.284-2.096 | < 0.001 |
| LM lesion | 2.450 | 1.822-3.295 | < 0.001 |
| Multi-vessel lesion | 2.936 | 2.337-3.689 | < 0.001 |
| Complete revascularization | 0.589 | 0.498-0.696 | < 0.001 |
| Number of DES, per 1 DES | 1.257 | 1.187-1.331 | < 0.001 |

*BMI* body mass index, *SBP* systolic blood pressure, *DBP* diastolic blood pressure, *CAD* coronary artery disease, *MI* myocardial infarction, *PCI* percutaneous coronary intervention, *PAD* peripheral artery disease, *UA* unstable angina, *TG* triglyceride, *TC* total cholesterol, *LDL-C* low-density lipoprotein cholesterol, *HDL-C* high-density lipoprotein cholesterol, *hs-CRP* high-sensitivity C-reactive protein, *eGFR* estimated glomerular filtration rate, *FBG* fasting blood glucose, *HbA1c* glycosylated hemoglobin A1c, *LVEF* left ventricular ejection fraction, *DAPT* dual antiplatelet therapy, *OHA* oral hypoglycemic agents, *LM* left main artery, *DES* drug-eluting stent
